# Supplementary material
Source: PubMed Central journal article supplement (PMC7950760)
Supplement: IWJ-9-1-s001.pdf [file IWJ-9-1-s001.pdf]

## ARTÍCULO ORIGINAL

# Extendiendo el concepto «TIME»: ¿Qué hemos aprendido en los últimos 10 años?

Leaper DJ<sup>1</sup>, Schultz G<sup>2</sup>, Carville K<sup>3</sup>, Fletcher J<sup>4</sup>, Swanson T<sup>5</sup> & Drake R<sup>6</sup>

1 Visiting Professor of Surgery, Section of Wound Healing, Cardiff University, Cardiff, UK

2 UF Research Foundation Professor, Department of Obstetrics and Gynecology, Institute for Wound Research, University of Florida, Gainesville, USA

3 Professor Primary Health Care & Community Nursing, Silver Chain Nursing Association & Curtin University, Osborne Park, Western Australia

4 Senior Lecturer, Institute for Translation, Innovation, Methodology and Engagement, Cardiff University, Cardiff, UK

5 Chair, International Wound Infection Institute, South West Healthcare, Warrnambool, Victoria, Australia

6 Medical Writer, London, UK

## Palabras clave:

preparación del lecho de la herida; TIME; desbridamiento; heridas crónicas; infección; inflamación; equilibrio de la humedad

## Dirección para correspondencia:

prof.davidleaper@doctors.co.uk

Leaper DJ, Schultz G, Carville K, Fletcher J, Swanson T, Drake R. Extendiendo el concepto «TIME»: ¿Qué hemos aprendido en los últimos 10 años?. *Int Wound J* 2014; doi: 10.1111/iwj.1097

## Resumen

El acrónimo TIME (por sus siglas en inglés (**T**issue, **I**nfection / inflammation, **M**oisture balance, **E**dge of wound) que equivalen a tejido, infección/inflamación, balance/equilibrio de la humedad y borde o margen de la herida) fue desarrollado hace más de 10 años por un grupo internacional de expertos en cicatrización para proporcionar un marco para el abordaje estructurado de la preparación del lecho de la herida (PLH), las bases para optimizar el manejo de una herida crónica abierta que se cicatriza por segunda intención.

Sin embargo, hay que reconocer que los principios del TIME son solo parte de una evaluación sistemática y holística de cada paciente en cada valoración de la herida.

La presente revisión, preparada por el Instituto Internacional de Infección en Heridas, examina como nuevos datos y evidencias generados en la década que transcurrió tras la su definición inicial, afectan a los conceptos originales del TIME, y como estos se traducen en un conjunto de los mejores cuidados y prácticas de acuerdo con las mejores evidencias actuales. Sobresalen cuatro desarrollos: el reconocimiento de la importancia de los biofilms (biopelículas) y la necesidad de un método simple de diagnóstico de los mismos, la utilización de la terapia de heridas con presión negativa (TPN), la evolución de la terapia antiséptica tópica en forma de apósitos y de productos para el lavado de las heridas (con especial mención a la plata y la polihexametilen-biguanida) y una profundización en el conocimiento acerca del papel de los procesos biológicos en la cicatrización de las heridas crónicas (con la aparición de instrumentos diagnósticos y complementos terapéutico-diagnósticos).

**Tejido:** Un avance muy importante ha sido el reconocimiento del valor de desbridamiento repetitivo y mantenido y de la limpieza de las heridas, tanto con métodos ya conocidos hace tiempo como con métodos nuevos (por ejemplo utilizando la TPN y la hidrociurugía).

**Infección/Inflamación:** El reconocimiento clínico de la infección (y de las causas no infecciosas de la inflamación persistente) es un elemento crítico. El concepto del «continuum» bacteriano a través de la transición de contaminación, a colonización e infección es algo aceptado ampliamente, junto con la comprensión de lo que representa la presencia de las biopelículas (en inglés biofilm). Ha habido un regreso a los antisépticos tópicos para controlar la biocarga bacteriana en las heridas, enfatizada por el reconocimiento del aumento en las resistencias a los antibióticos.

**Humedad (Moisture):** La relevancia del papel del exudado excesivo o insuficiente de la herida y sus componentes moleculares ha llevado al desarrollo y uso de una amplia gama de apósitos para regular el grado de humedad, proteger la piel perilesional y optimizar la cicatrización.

**Borde/margen de la herida (Edge):** Hoy en día se están investigando e introduciendo en el mercado varias modalidades de tratamiento para mejorar el avance epitelial, circunstancia que se puede considerar como el signo más claro de que una herida está cicatrizando.

El principio del **TIME** permanece relevante 10 años más tarde, con importantes adelantos continuos que incorporan nueva evidencia para el cuidado de las heridas.

## Introducción

El acrónimo **TIME** fue desarrollado por primera vez hace más de 10 años por un grupo internacional de expertos en cicatrización de heridas para proporcionar un marco que facilitase un abordaje estructurado de la preparación del lecho de la herida (1) (PLH). Este concepto fue adoptado de un principio utilizado en la cirugía plástica para asegurar la preparación óptima del lecho de una herida receptora previo a la aplicación de un injerto de espesor parcial, y se consideró como un marco de referencia relevante para optimizar el manejo de heridas crónicas abiertas que cicatrizan por segunda intención. Este marco fue por tanto nombrado «preparación del lecho de la herida», y fue subsecuentemente publicado en 2003 por Schultz y colaboradores (1). Desde entonces, el acrónimo **TIME** ha sido utilizado ampliamente como una guía práctica para la evaluación y el tratamiento de las heridas crónicas. Las observaciones clínicas e intervenciones relacionadas con la PLH se agrupan en 4 áreas, todas las cuales necesitan ser consideradas en cada evaluación de la herida (Figura 1):

- **Tejido** – Abordaje y desbridamiento del tejido no viable o el material extraño (incluyendo tejido necrótico del hacedero, material residual de los apósitos, esfacelos, biopelículas relacionadas con múltiples organismos, exudado y otros residuos) en la superficie de la herida.
- **Infección/Inflamación** – evaluación de la etiología de cada herida, necesidad del uso de antisépticos tópicos y/o antibióticos sistémicos para control de la infección y manejo de los procesos inflamatorios no relacionados con la infección.
- **(Moisture balance)** Equilibrio en la humedad – Evaluación de la etiología y manejo del exudado de la herida
- **(Edge of the wound)** Borde/margen de la herida – evaluación de un borde que no avanza o está socavado (así como del estado de la piel perilesional).

El acrónimo **TIME** fue presentado por primera vez en la reunión anual de 2003 de la European Wound Management Association, y desde entonces ha sido citado frecuentemente en una gran cantidad de artículos sobre el tratamiento de heridas, guías, protocolos y documentos de consenso, además de haber sido incluido en otros formatos como instrumentos prácticos de enseñanza y para listados o formularios de productos hospitalarios. Aunque seguramente aspectos del acrónimo **TIME** se han considerado por algunos autores como problemáticos (lo que se discutirá más adelante), el consenso general acepta que globalmente se trata de una herramienta útil. De cualquier manera, los

principios del **TIME** siempre deben considerarse como parte de una evaluación holística y sistemática del paciente y de los factores de su entorno socio-económico-cultural que pueden influir en la cicatrización (Figura 1).

Desde que el acrónimo **TIME** se desarrolló, han habido varios avances en la ciencia de la cicatrización, de manera notable en el campo de la investigación molecular y biológica y en el desarrollo, introducción y uso de nuevas terapias para el tratamiento de las heridas. Podemos destacar cuatro de estos avances o desarrollos:

- El Reconocimiento de la presencia de las biopelículas en las heridas crónicas ha crecido exponencialmente. Aunque ello es todavía es fuente de mucho debate y discusión, hoy en día conocemos que las biopelículas tienen una influencia negativa en las heridas crónicas y que el manejo y erradicación de las mismas es una parte integral de la cicatrización de las mismas.
- El aumento en el uso de la terapia de heridas con presión negativa (TPN), que ha tenido una influencia cada vez mayor en las posibilidades del tratamiento de diferentes tipos de heridas incluyendo las heridas agudas y las crónicas.
- Evaluación y desarrollo de varios tratamientos antimicrobianos (particularmente plata y otros apósitos antisépticos)
- Descubrimientos en la biología molecular de las heridas y en el papel que tienen las proteasas y los marcadores pro-inflamatorios en heridas crónicas que han llevado a la aparición de dispositivos de diagnóstico y complementos terapéutico-diagnósticos.

En respuesta a estos avances y a una década de nueva evidencia en la literatura, el Instituto Internacional de Infección en Heridas (International Wound Infection Institute (IWII)) ha revisado el acrónimo **TIME** y los principios de la PLH para determinar su validez de acuerdo con las mejores prácticas clínicas actuales. La tabla original de la publicación de 2003 (1) ha sido evaluada en el contexto de estos nuevos desarrollos y se ha producido una nueva versión detallando importantes adelantos que impactarán en los principios del **TIME**.

## TIME - Tejido

A lo largo de la década pasada se han producido importantes desarrollos en la tecnología para el cuidado de heridas; en particular en los dispositivos o terapias utilizados para el desbridamiento de las heridas como los ultrasonidos de baja frecuencia,

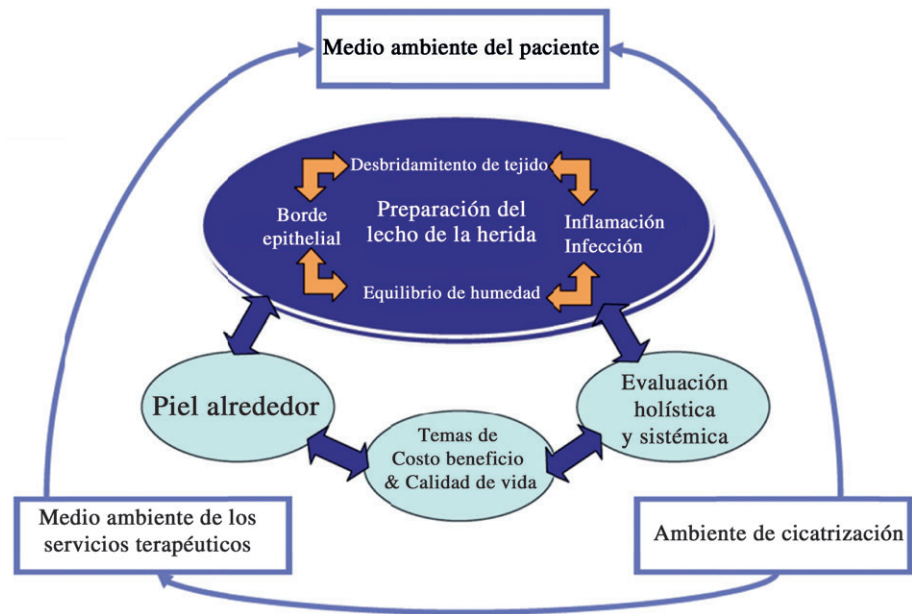

**Figura 1** El concepto TIME como parte de la evaluación global del paciente (creado por David Leaper & Diane Smith, con agradecimiento a Caroline Dowsett por el concepto original del Ciclo del Cuidado).

los dispositivos de hidroterapia, la larvaterapia o terapia larval y los agentes enzimáticos. Más aún, cada vez hay una mayor comprensión del papel que juega el desbridamiento en el tratamiento de la carga bacteriana en las heridas y la infección, en el manejo de las biopelículas y en el manejo ulterior del equilibrio de la humedad.

Itiples organismos o esfacelo, exudado o dadl tratamiento de la carga bacteriana en las heridas y la infecceiheridas como el ultr.

### Desbridamiento

El tejido necrótico y excesivamente colonizado, las biopelículas relacionadas con múltiples organismos, los esfacelos, el exudado o los cuerpos extraños son elementos comunes en las heridas crónicas que no están cicatrizando y se sabe que retrasan la cicatrización, crean un foco para la infección, exacerbando la respuesta inflamatoria e impiden la progresión óptima de la granulación de la herida, la contracción y la epitelización. La eliminación de este material es por tanto considerada como una actividad de gran utilidad para estimular el crecimiento de tejido sano hacia la cicatrización (2–4). Los métodos de desbridamiento están resumidos en la Tabla 1.

Numerosas guías y recomendaciones sobre la PLH han sido publicadas con posterioridad a la aparición del primer concepto TIME. El llamado Índice de Realización del Desbridamiento fue publicado en 2002, y mostró ser un predictor independiente de cierre exitoso de la herida. Éste evalúa la remoción del callo, de los bordes socavados y del tejido necrótico en el lecho de la herida (12). Se ha desarrollado un Sistema de Calificación del Lecho de la Herida (SCLH) (13), que facilita una valoración más general de la herida y de la PLH. Éste índice califica los siguientes parámetros clínicos (puntuando de 0 a 1): bordes cicatrizando (efecto del borde de la herida), presencia de escara, máxima profundidad de la herida / tejido de granulación, cantidad de exudado, edema, inflamación de la piel perilesional,

callo perilesional y/o fibrosis, y presencia de un lecho de la herida de color rosa/rojo. La puntuación total posible es de 16, pudiéndose esperar una puntuación en el SCLH mucho más alta en las heridas que van a cicatrizar por completo en comparación con aquellas que no van a cicatrizar.

Las recomendaciones de otro panel de expertos (14) proponen el uso de desbridamiento de mantenimiento para eliminar el tejido del lecho de la herida cuando está colonizado con una sobrecarga bacteriana. El objetivo de esta acción es ayudar a mantener la herida en un proceso de cicatrización continua y se recomienda que el desbridamiento de mantenimiento debe realizarse si la herida no muestra evidencia de cierre – incluso si el lecho de la herida se ve clínicamente «saludable».

Una lista de consejos fundamentales para desbridamiento de las heridas (5) recomienda aquellos procedimientos y principios específicos que hay que seguir cuando se realicen los métodos de desbridamiento más comúnmente utilizados. (Esquema 1) Antes de iniciar cualquier desbridamiento se recomienda al personal sanitario que se asegure que el paciente entienda el procedimiento, y a obtener de este, el consentimiento informado.

#### Esquema 1. Consejos fundamentales para el desbridamiento (5)

- Medio ambiente
  - Asegúrese que la habitación escogida para el tratamiento es adecuada, con adecuadas instalaciones de eliminación.
  - La habitación deberá incluir privacidad, iluminación adecuada y capacidad de posicionar.
  - Cierre puertas y ventanas para prevenir contaminación cruzada

**Tabla 1** Métodos de desbridamiento

| Tipo de desbridamiento                                                                                                                                                                                                           | Método usado                                                                                                                                                                                                                                                                                                                                                                                                                                                                                                                                                                                                                                                                                                                                                                                                                                                                                                                                                                                                |
|----------------------------------------------------------------------------------------------------------------------------------------------------------------------------------------------------------------------------------|-------------------------------------------------------------------------------------------------------------------------------------------------------------------------------------------------------------------------------------------------------------------------------------------------------------------------------------------------------------------------------------------------------------------------------------------------------------------------------------------------------------------------------------------------------------------------------------------------------------------------------------------------------------------------------------------------------------------------------------------------------------------------------------------------------------------------------------------------------------------------------------------------------------------------------------------------------------------------------------------------------------|
| <b>Desbridamiento autolítico</b> <ul style="list-style-type: none"> <li>• Humedece el tejido necrótico permitiendo la degradación por las enzimas del hospedero (2,5).</li> </ul>                                                | <p>Apósitos oclusivos o semi-occlusivos (hidrocoloides, alginatos) o hidrogeles (2,5,6).</p> <p>Solución salina hipertónica y miel, apósitos que proporcionen «fuerzas osmóticas», bañar el lecho de la herida (7)</p> <p>Poliacrilato activado con solución de Ringer (8)</p> <p>Algunos antisépticos (plata, miel y productos a base de yodo) también se pueden usar como agentes desbridantes autolíticos.</p> <p>Colagenasa/papaína: no disponibles en todo el mundo (la papaína se ha discontinuado, como también la estreptoquinasa/estreptodornasa + fibrinolisisa desoxyribonucleasa) (9,10)</p>                                                                                                                                                                                                                                                                                                                                                                                                    |
| <b>Desbridamiento enzimático</b> <ul style="list-style-type: none"> <li>• Necesidad de cambios frecuentes de apósito</li> <li>• Lento pero específico</li> <li>• Puede usarse con otras estrategias de desbridamiento</li> </ul> | <p>Colagenasa/papaína: no disponibles en todo el mundo (la papaína se ha discontinuado, como también la estreptoquinasa/estreptodornasa + fibrinolisisa desoxyribonucleasa) (9,10)</p>                                                                                                                                                                                                                                                                                                                                                                                                                                                                                                                                                                                                                                                                                                                                                                                                                      |
| <b>Desbridamiento mecánico</b> (5) <ul style="list-style-type: none"> <li>• No específico pero de resultados rápidos</li> <li>• Puede ser doloroso + dañar tejido viable</li> </ul>                                              | <p>Hidrocirugía o desbridamiento con la limpieza de la herida – agua presurizada utilizada con una pieza de mano para controlar la presión (a entre 4 y 14 libras por pulgada cuadrada (psi por sus siglas en inglés) Un nuevo sistema de limpieza de la herida usa solución salina presurizada vía una boquilla a 12,800 – 15,000 psi (11)</p> <p>Desbridamiento con remolino de agua (Whirlpool en inglés)</p> <p>Almohadillas para desbridar de reciente desarrollo con monofilamentos que se argumenta retienen el tejido muerto y las bacterias.</p> <p>Desbridamiento por ultrasonido: (5) Dos tipos: contacto y no contacto Sonda de ultrasonido – agita el lecho de la herida directamente, actúa por cavitación y corriente acústica.</p> <p>Salina atomizada – burbujas llenas de gas explotan en el lecho de la herida levantando el tejido necrótico y las células bacterianas</p> <p>Se utilizan la <i>Lucilia sericata</i> (antes <i>Phaenicia sericata</i>) y la <i>Lucilia cuprina</i>.</p> |
| <b>Larvaterapia</b> (5) <ul style="list-style-type: none"> <li>• Micro-desbridamiento selectivo</li> </ul>                                                                                                                       |                                                                                                                                                                                                                                                                                                                                                                                                                                                                                                                                                                                                                                                                                                                                                                                                                                                                                                                                                                                                             |
| <b>Desbridamiento quirúrgico</b> (5) <ul style="list-style-type: none"> <li>• No selectivo</li> <li>• Riesgo de sangrado + daño tisular</li> <li>• Cirujano o personal de salud con conocimiento</li> </ul>                      | <p>Para eliminar tejido necrótico / séptico usando bisturí + tijeras</p> <p>Para eliminación a gran escala de tejido necrótico / séptico usando bisturí + tijeras – por personal de salud entrenado solamente</p>                                                                                                                                                                                                                                                                                                                                                                                                                                                                                                                                                                                                                                                                                                                                                                                           |
| <b>Desbridamiento químico</b>                                                                                                                                                                                                    | <p>Antisépticos (octenidina, plata, yodo povidona, clorhexidina y PHMB)</p> <p>Agentes más antiguos para desbridar (peróxido de hidrógeno e hipoclorito de sodio) pueden ser dolorosos y tener efectos tóxicos en el tejido sano, pero también pueden ser útiles en periodos cortos de tiempo.</p>                                                                                                                                                                                                                                                                                                                                                                                                                                                                                                                                                                                                                                                                                                          |

- Se deberá proveer equipo básico, por ejemplo, bisturí, pinzas de Adson, cureta o legra y tijeras cortantes para tejido.
- Inspección de la herida
  - Realice una inspección exhaustiva de la herida.
  - Enfoque su atención en el material de la herida que debe ser removido.
  - Asegúrese que no existan estructuras tales como ligamentos o vasos sanguíneos dentro del tejido a remover.
  - Considere la condición del paciente y de la herida además de la meta del tratamiento.
  - Asegúrese que el método de desbridamiento elegido es seleccionado para el volumen de material a remover.
- Habilidades
  - Asegúrese que el método de desbridamiento seleccionado cae dentro de las habilidades y entrenamiento del personal de salud.

### Limpieza de la herida

Dos revisiones recientes del «Grupo Cochrane Review» han resumido los métodos que se usan para la limpieza de las heridas. En la primera se revisó la limpieza de las úlceras por presión (UPP) y concluyó que hay poca evidencia que apoye el uso de un spray que contiene *Aloe vera*, cloruro de sodio y decilglucósido en estas heridas, pero no pudo encontrar ninguna evidencia fuerte que apoyase el uso de ninguna otra solución o técnica para la limpieza de las UPP (15). La segunda revisión concluyó que no hay evidencia de que usar agua limpia del grifo para limpiar la herida aumente el riesgo de infección y que no hay evidencia fuerte que sugiera que la limpieza de la herida disminuye la infección o promueve la cicatrización (16). Esta revisión fue actualizada en 2012 (17), pero ningún estudio nuevo fue elegido para su inclusión en la misma. Sin embargo, en esta actualización, los autores concluyen que existe algo de evidencia acerca de que usar agua potable del grifo para limpiar

la herida pudiese reducir la infección, y que es probable que ésta sea tan segura como el agua estéril o la solución salina. A pesar de ello, hay que tener cuidado con la utilización de agua de la red en pacientes inmuno-comprometidos, particularmente si existe la posibilidad de que el agua no sea potable (18). El uso de soluciones de irrigación con antisépticos no citotóxicos para la limpieza de la herida es ampliamente practicada, pero la evidencia para su uso es débil y requiere de más investigación.

### Terapia con Presión Negativa (TPN)

El uso de la TPN o terapia asistida por vacío, se ha vuelto cada vez más prominente en el tratamiento de las heridas. La presión negativa, cuando se aplica a la herida vía una espuma o gasas sellada, facilita el drenaje del fluido de la herida y reduce el edema y la biocarga de microorganismos, mientras que aumenta la perfusión en la herida. Avances recientes han demostrado que la TPN puede aflojar el esfacelo y la necrosis y facilita el desbridamiento quirúrgico (19), aunque se recomienda tener precaución cuando hay más de 20% de tejido desvitalizado. La combinación de TPN con otros diversos métodos de desbridamiento ha demostrado que apoya los principios del TIME al acelerar la eliminación de exudado y de material infeccioso y promover la formación de tejido de granulación, contracción y epitelización (20).

*TIME – Tejido. ¿Que ha cambiado? La tabla original del TIME indicaba que el tejido no viable, la biopelícula asociada a múltiples organismos o el esfacelo, el exudado y los detritus significan un lecho de la herida defectuoso que debe ser desbridado para restablecer la cicatrización normal. Este principio no ha cambiado, aunque algunas prácticas usadas para facilitar estas acciones se han modificado a través de los años. Avances en la tecnología para desbridar tales como los ultrasonidos de baja frecuencia, la hidrocirugía y el uso adicional de dispositivos de TPN han dado lugar a mejores y más eficaces resultados terapéuticos, de la misma forma que lo han hecho los avances en los métodos de desbridamiento tradicionales no quirúrgicos como el uso de larvas y el desbridamiento enzimático. La práctica del desbridamiento de mantenimiento continuo para el manejo de heridas crónicas estáticas también ha representado una mejora en los resultados clínicos.*

### TIME – Infección / Inflamación

La inflamación es una respuesta fisiológica a la formación de una herida y se requiere para que la cicatrización progrese. Sin embargo, la inflamación excesiva o inapropiada, frecuentemente por la presencia de infección, puede tener consecuencias serias para el paciente. La cronicidad o el estancamiento de la cicatrización en heridas puede deberse a procesos de inflamación persistente (2,18). Las heridas que no progresan más allá de la fase inflamatoria frecuentemente demuestran una actividad de las proteasas, tales como las metaloproteasas de matriz (MMPs por sus siglas en inglés) y las elastasas elevadas, así como la persistencia de células inflamatorias. La degradación prolongada

de la matriz extracelular y la supresión o eliminación de factores de crecimiento también pueden obstaculizar la cicatrización. La presencia de biopelículas en la herida puede inhibir aún más la regulación a la baja de la respuesta inmune causando un debilitamiento sistémico, a menos que sea eliminada y tratada (21). La eliminación o reducción de la inflamación prolongada revitaliza al tejido en cicatrización, reduce el exudado y normalmente se asocia con una reducción de la biocarga. Es importante que el personal de salud pueda distinguir con confianza los signos y síntomas de la inflamación relacionada con la fisiología normal de la cicatrización de aquellos elementos relacionados con la inflamación excesiva causada por etiologías subyacentes adversas e infección. El personal de salud debe, sin embargo, ser consciente que la inflamación puede ser también el resultado de varias enfermedades o procesos no infecciosos, o autoinmunes como el lupus eritematoso sistémico, la artritis reumatoide, la vasculitis o esclerodermia o ser debida a una condición inflamatoria como la enfermedad inflamatoria intestinal donde el pioderma gangrenoso puede aparecer. Su reconocimiento y manejo está más allá del alcance de este capítulo.

Los signos y síntomas de infección pueden ser sutiles o no específicos (Esquema 2) – por lo que se debe tener cuidado de cerciorarse de que sean reconocidos (22).

#### Esquema 2. Guía simplificada para los signos de infección en las heridas crónicas (22).

Signos generales

- Malestar general
- Pérdida del apetito

Signos locales de la herida

- Aumento en el exudado
- Retraso en la cicatrización
- Nuevas áreas de ulceración
- Formación de bolsas en la base de la herida
- Punteo epitelial
- Dolor o molestia inesperados
- Tejido de granulación friable
- Cambio de coloración del lecho de la herida
- Formación de abscesos
- Mal olor

Todas las heridas están potencialmente sujetas a contaminación microbiana exógena y endógena. La biocarga microbiana en una herida puede ir inicialmente desde la contaminación, la colonización o colonización crítica hasta la infección local y sistémica si no se controlan apropiadamente (Tabla 2). Se ha sugerido que esta progresión también está influenciada por la presencia de biopelículas bacterianas madurando en la herida (23).

El personal de salud debe estar alerta de los signos y síntomas de infección localizada, de infección en extensión (como en la celulitis y linfangitis) y de la infección sistémica. Los signos clásicos de la infección son generalmente obvios en heridas agudas o quirúrgicas en pacientes inmunocompetentes. Cuando los pacientes están inmunosuprimidos o desnutridos, o tienen comorbilidades como la diabetes mellitus, anemia, insuficiencia renal o hepática, patología oncológica, artritis reumatoide,

**Tabla 2** El continuo de la infección de la herida

|                                               |                                                                                                                                                                                                    |
|-----------------------------------------------|----------------------------------------------------------------------------------------------------------------------------------------------------------------------------------------------------|
| <i>Contaminación</i>                          | Las bacterias no se multiplican ni causan problemas clínicos                                                                                                                                       |
| <i>Colonización</i>                           | Las bacterias se multiplican pero los tejidos no son dañados                                                                                                                                       |
| <i>Colonización crítica / infección local</i> | Las bacterias se multiplican al grado que la cicatrización es alterada y el tejido de la herida es dañado<br>Puede también significar que existen comunidades de bacterias presentes en la herida. |
| <i>Infección en propagación</i>               | Las bacterias se propagan de la herida causando problemas en los tejidos sanos vecinos (celulitis y linfangitis)                                                                                   |
| <i>Infección sistémica</i>                    | Las bacterias se propagan de la herida causando infección en todo el cuerpo (respuesta inflamatoria sistémica, sepsis, falla orgánica).                                                            |

obesidad mórbida o enfermedad arterial, cardíaca o respiratoria, estos signos de infección pueden ser más sutiles. En las heridas crónicas un aumento del dolor y en el tamaño de la lesión en úlceras crónicas son probablemente los dos predictores más útiles (24).

La decisión de usar antibióticos tópicos o sistémicos debe ser considerada cuidadosamente a la luz del riesgo de resistencias antimicrobianas, pero los apósitos antisépticos tópicos pueden ser medidas profilácticas valiosas en pacientes donde se sospecha infección – particularmente conforme más evidencia sugiere que pueden prevenir la adhesión y la maduración de las biopelículas (25).

### Biopelículas

Una biopelícula es una comunidad microbiana compleja que consiste en bacterias embebidas en una matriz protectora de azúcares y proteínas (glicocalix). Se sabe que las biopelículas se forman en la superficie de los dispositivos médicos y que también se han encontrado en las heridas (21,23,26). Las biopelículas proveen un efecto protector para los microorganismos que viven en su interior, mejorando su tolerancia al sistema inmunológico del hospedero, los antimicrobianos y la tensión del medio ambiente. Las comunidades bacterianas en las biopelículas interactúan con el tejido del hospedero, con el resultado de una adhesión estable, una nutrición sostenible y una relación parasítica (21,23,26,27). Las bacterias en las biopelículas tienen una diversidad fenotípica y genotípica considerable (21).

Las biopelículas primero forman una unión reversible a la superficie de la herida, que posteriormente se puede volver permanente con diferenciación bacteriana y una mayor acumulación del glicocalix protector. Las estructuras de las biopelículas se han reconocido en biopsias, utilizando microscopía electrónica y microscopía confocal, en un 60% de las heridas crónicas y un 6% de las heridas agudas (28). Las biopelículas son un factor contribuyente mayor en los cambios inflamatorios crónicos y persistentes en el lecho de la herida y es probable que casi todas las heridas crónicas contengan comunidades de biopelículas por lo menos en alguna parte de las mismas (21,23,26).

Constituyen un problema en las heridas por la respuesta crónica inflamatoria que estimulan, la cual a su vez beneficia a los organismos presentes en la biopelícula. Las biopelículas maduras también desprenden fragmentos de las mismas, bacterias planctónicas y micro colonias que se dispersan para formar nuevas colonias de biopelícula, con el riesgo de infección invasora local o profunda.

El tratamiento recomendado para el manejo de las biopelículas es una estrategia combinada para reducir la carga de la biopelícula y prevenir que ésta se vuelva a reconstituir. Una vez que la biopelícula se ha desorganizado, se auto-reconstituye mediante una fase de crecimiento metabólicamente activa de los microorganismos presentes, siendo más vulnerable a los agentes que se usan como tratamiento durante este estado. Es importante entender la genética de la biopelícula usando métodos moleculares de diagnóstico lo que facilitará, que la terapia sea enfocada de forma más específica. El uso de desbridamiento agresivo frecuente y continuado, antibióticos de larga duración a dosis altas, biocidas selectivos y combinaciones de agentes anti-biopelícula bacteriana son las principales estrategias en el cuidado de la heridas con biopelículas. (Esquema 3) (21,23,26). Existen evidencias acerca de que los apósitos que contienen plata pueden ser útiles en prevenir la reconstitución de la biopelícula. Sin embargo, su eficacia ha mostrado ser variable, como es el caso de los apósitos de carbón impregnados en plata y el de los de alginato-carboximetilcelulosa-nylon que no pudieron prevenir la formación de biopelícula (29).

### Esquema 3. Estrategias sugeridas para la eliminación y prevención de la biopelícula.

#### 1. Remoción de la biopelícula

- Desorganización física (comúnmente aceptado que el desbridamiento agresivo / quirúrgico es el mejor método)
- Desbridamiento regular para reducir el potencial de la biopelícula para volver a crecer.
  - Acompañado de lavado físico vigoroso (como irrigación o ultrasonido)

*Algunos productos se piensa que ayudan a la limpieza física facilitando la remoción de biopelícula y esfacelo, y desorganizar la biopelícula (por ejemplo los limpiadores con PHMB se cree son efectivos en desorganizarla debido a su componente de surfactante).*

#### 2. Prevención de la reconstitución de la biopelícula

- Uso racional de los apósitos para prevenir mayor contaminación de la herida.
- Uso de un antimicrobiano de amplio espectro (plata, yodo, miel, PHMB) para matar los microorganismos planctónicos.
- Cambiar a un antimicrobiano diferente si no hay progreso.

No es posible establecer categóricamente cuando una herida está libre de biopelícula porque hay una falta de signos clínicos

definitivos y de pruebas de laboratorio disponibles. El indicador clínico más probable es la progresión de la cicatrización con reducción del exudado y el esfacelo. Las pruebas estándar de microbiología no están optimizadas para medir adecuadamente las bacterias de la biopelícula; el método más confiable para detectar biopelículas bacterianas es utilizar microscopía especializada. La disponibilidad de un método diagnóstico simple se espera con gran interés. El juicio del personal de salud es vital al momento de decidir como tratar heridas que contienen lo que se sospecha que pueda ser una biopelícula. Es importante re-evaluar frecuentemente la herida y también practicar un abordaje holístico de la salud del paciente para promover la cicatrización. Los agentes anti-biopelícula (como la plata, el yodo y los apósitos de miel) se recomiendan para el tratamiento de heridas que contienen biopelículas o sospecha de biopelículas, pero las heridas deben ser reevaluadas regularmente paciente por paciente (26).

### ¿Son visibles las biopelículas?

Aunque la existencia de las biopelículas en las heridas es aceptada, aún existe mucha discusión sobre su visibilidad a simple vista (30). Se ha sugerido que el material opaco que se ve en las heridas crónicas puede ser biopelícula que se vuelve a formar después de su remoción y que puede indicar la presencia de colonización crítica que precede la infección evidente. La biopelícula de la herida, si es que es visible a la simple vista, puede por lo tanto también representar una herramienta diagnóstica en el abordaje de las heridas (31). Sin embargo, esta evidencia es enteramente conjetural y para definir la biopelícula seguirá siendo necesario el uso de microscopía confocal o electrónica. El interés por una prueba diagnóstica es claro.

### Manejando la colonización de la herida por microorganismos

El uso prudente de los apósitos y soluciones de irrigación modernos impregnados con antisépticos puede reducir los micro-organismos en la superficie de la herida y en las biopelículas. Las preocupaciones en relación a los antisépticos convencionales y su toxicidad al hospedero han sido ampliamente discutidas, (32) pero el punto de vista clínico que prevalece es que es apropiado el uso es de la mayor parte de las soluciones y apósitos contemporáneos de acuerdo a las instrucciones del fabricante y de los protocolos locales.

### Antimicrobianos

El término «antimicrobiano» se usa de forma amplia para describir desinfectantes, antisépticos y antibióticos. La razón principal para usar antimicrobianos en el cuidado de heridas es para prevenir o tratar la infección, y por tanto facilitar la cicatrización. A diferencia de los antibióticos, los desinfectantes y los antisépticos, tienen un mayor espectro de actividad antimicrobiana, y la resistencia microbiana es rara, particularmente a los patógenos humanos. Por otro lado, los antibióticos tienen una actividad antimicrobiana selectiva, y la resistencia microbiana a los mismos es una preocupación (33–35). La colonización y la

infección en las heridas crónicas se deben normalmente a una población mixta de microorganismos. Para poder seleccionar el mejor abordaje antimicrobiano, es vital tener un diagnóstico preciso de los organismos, especialmente cuando se usan antibióticos, ya que las sensibilidades microbianas se pueden también usar para guiar la mejor elección de terapia. El diagnóstico se puede hacer con biopsia de tejido o con cultivo con hisopo; en particular se ha visto una alta precisión usando la técnica de Levine (36,37).

### Resistencia microbiana

La resistencia microbiana a los antibióticos es una preocupación que va en aumento (34). La mayor diferencia entre antibióticos y antisépticos es que los antibióticos trabajan más específicamente, permitiendo a las bacterias la oportunidad para mutar y formar resistencias, mientras que los antisépticos funcionan a todos niveles de la biología celular, así que la resistencia bacteriana es menos probable. La actividad de los agentes antimicrobianos tópicos ha sido probada contra bacterias multi-droga resistentes (MDR) aisladas de heridas por quemaduras. El acetato de mafenida fue el agente más efectivo contra bacterias gramnegativas, y la plata tuvo eficacia moderada. Se recomienda así, continuar usando plata para profilaxis de gramnegativos, acetato de mafenida para su tratamiento y mupirocina para *Staphylococcus aureus* resistente a metilina (SARM) (38). No se ha encontrado resistencia a la plata en un grupo de cepas bacterianas tomadas de 349 aislamientos clínicos y 170 no-clínicos de humanos, carne y animales de producción (39). El uso de antibióticos tópicos no se recomienda generalmente ya que aumentan más la inducción de resistencia y alergia.

Los apósitos antisépticos tópicos se recomiendan para (22):

- Prevención de la infección en pacientes que se consideran en riesgo
- Tratamiento de infección localizada de la herida
- Tratamiento local de infección sumado al tratamiento sistémico en caso de infección local diseminada o generalizada.

El uso de apósitos antisépticos debe continuarse por 14 días (la «regla de las dos semanas») y la necesidad de mayor terapia antimicrobiana tópica se debe entonces re evaluar (40). El uso de apósitos antisépticos debe considerarse para aquellos pacientes con riesgo alto de infección o para el tratamiento temprano de heridas localmente infectadas (celulitis, linfangitis o eritema), y descontinuado si estos tres signos de infección en avance o local se resuelven. Sin embargo, si los signos de infección persisten, el uso de antibióticos sistémicos es necesario y debiera ser prescrito de acuerdo con cultivos microbiológicos por hisopo de la herida o resultados de hemocultivos y sensibilidades. El tratamiento empírico con antibióticos de amplio espectro puede iniciarse con posterioridad al diagnóstico clínico, pero los tratamientos antibióticos específicos deberán prescribirse una vez que los organismos infectantes y sus sensibilidades antibióticas hayan sido identificados. El uso simultáneo de apósitos antisépticos tópicos y desbridamiento puede emplearse para reducir la biocarga local de la herida.

### Apósitos de plata

La plata tiene una historia larga de uso como antimicrobiano tópico en el cuidado de las heridas – desde la aplicación histórica directamente en las heridas en su forma sólida, a la aplicación moderna de soluciones de sales de plata como el nitrato de plata para la limpieza de las heridas, y cremas y ungüentos como la sulfadiazina de plata o argéntica (SDA) (40). La plata metálica ( $\text{Ag}^0$ ) es relativamente inerte, pero cuando se expone a la humedad, los iones altamente reactivos de plata ( $\text{Ag}^+$ ) se liberan y ávidamente se unen a proteínas tisulares y causan cambios estructurales en las paredes celulares bacterianas y membranas intracelulares y nucleares. Esta actividad antimicrobiana, personificada por los iones de plata  $\text{Ag}^+$ , forma complejos fuertes con vías metabólicas esenciales para las bacterias, volviéndolas inoperantes y llevando a la muerte del microbio.

Varios apósitos que contienen plata están disponibles para manejar la biocarga de la herida y están disponibles en diferentes formas:

- Elemental – plata metálica, plata nanocrystalina
- Inorgánica – óxido de plata, fosfato de plata, cloruro de plata, sulfato de plata, fosfato de plata-calcio-sodio, compuestos de zirconio de plata, SDP
- Orgánica – Alantoinato de plata-zinc, alginato de plata, plata carboximetilcelulosa

La plata es incorporada al apósito ya sea como un recubrimiento, dentro del propio apósito, como parte del apósito o como una combinación de estos agentes. Los apósitos que incorporan tecnología nanocrystalina proporcionan una alta y sostenida liberación de iones  $\text{Ag}^+$

en la superficie de la herida. Las sales de plata se asocian con una mínima toxicidad, cuando son aplicadas tópicamente y no se han encontrado reportes clínicos fundamentados de toxicidad a la misma. La plata nanocrystalina ha demostrado tener propiedades anti-inflamatorias y cicatrizantes en heridas experimentales (41,42). En un estudio clínico, los apósitos de plata nanocrystalina, bajo vendajes compresivos de 4 capas, promovieron la cicatrización en pacientes con úlceras venosas de pierna crónicas (UVP) reacias. Las UVP no estaban clínicamente infectadas pero el tratamiento demostró una reducción de la biocarga bacteriana y de la inflamación asociada a los neutrófilos (43). Los apósitos de plata nanocrystalina también se ha visto que promueven la cicatrización con niveles reducidos de metaloproteasas en un modelo porcino de infección (44).

Los apósitos de alginato con plata han demostrado tener actividad antimicrobiana amplia contra gérmenes identificados en la herida, cultivados tanto en su estado de biopelícula como de no-biopelícula (45), y para disminuir rápidamente la viabilidad bacteriana en >90% de las células bacterianas y levaduras, en el apósito de alginato con plata, siendo no viables luego de 16 horas (46).

Sin embargo, no toda la investigación ha podido apoyar el uso de apósitos de plata. El estudio multicéntrico, prospectivo, aleatorizado VULCAN, examinó la eficacia y costo-eficacia de los apósitos de plata para tratar UVPs comparando los apósitos de plata con apósitos no-antimicrobianos de baja adherencia como apósito control. No se encontraron diferencias significativas en cicatrización entre los dos tipos de apósito, y se concluyó

que no había un beneficio del uso de apósitos de plata (47). Posterior a ello, un artículo de revisión expresó la opinión de que la base de evidencia existente que apoya el uso de apósitos de plata es débil y que era difícil justificar los montos gastados por el National Health Service (NHS (Sistema Nacional de Salud Británico-UK) en apósitos de plata (4). Éste artículo tuvo como resultado un impacto negativo en la percepción y uso de los apósitos con plata que llevaron a restricciones en su disponibilidad para uso clínico (40). Revisiones posteriores han declarado que el estudio VULCAN tiene muchos fallos, el principal que los apósitos de plata no fueron usados como se recomienda (49–51). Otros autores han comentado que los apósitos antimicrobianos, incluyendo la plata, son componentes clave en el tratamiento de pacientes con heridas infectadas, y que el no utilizar estos productos en los casos apropiados puede poner a los pacientes en riesgo (22,40).

### Apósitos de yodo

Las preparaciones a base de yodo tienen una larga historia de uso en cirugía y cuidado de heridas. El yodo elemental es tóxico a los tejidos, pero en sus formas de yodo povidona (I-PVP) y cadexómero, que son ambos yodóforos, no lo es (52). Hay evidencias que sugieren que los índices de cicatrización son más altos con cadexómero de yodo que con el manejo estándar, (52,53) y mientras que sus propiedades antimicrobianas son bien conocidas, varios estudios han indicado que el cadexómero de yodo puede ser potencialmente efectivo contra las biopelículas. El *Staphylococcus aureus* y su glicocalix relacionado, no se detectaron en cercanía con los gránulos de cadexómero en un modelo de dermis de ratón (54), y el cadexómero de yodo se ha demostrado que es efectivo contra la biopelícula de *Pseudomonas aeruginosa* en un modelo de piel porcina (55). Otro estudio más ha demostrado que el cadexómero de yodo penetra las biopelículas más eficazmente que la plata o la polihexametilguanida (PHMB) (56).

### Apósitos con polihexametilguanida

El antiséptico PHMB ha estado disponible para su uso general por más de 50 años, pero ha sido ahora introducido para el manejo de la biocarga en las heridas como apósitos impregnado en PHMB o soluciones y geles para irrigación de la herida. El compuesto activo es efectivo tanto para disminuir la carga bacteriana como para prevenir la penetración bacteriana del apósito, lo que reduce la posibilidad de desarrollo de la infección. La PHMB también parece tener baja toxicidad para los tejidos humanos y no promueve la resistencia bacteriana (50,57,58). El tratamiento con un apósito de biocelulosa que contiene polihexanida ha demostrado que elimina la carga bacteriana significativamente más rápido que los apósitos de plata (59).

### Miel

Los apósitos de miel de grado médico no son tóxicos y son «naturales» y fáciles de usar; están disponibles como hidrocoloides, alginatos, tul sintético o apósitos en base de gel y promueven el desbridamiento autolítico por ósmosis mientras que mantienen un ambiente húmedo (8). En pacientes con UVP se ha



demostrado un aumento en la cicatrización, menor infección y un desbridamiento de esfacelos más efectivo cuando se tratan con apósitos de miel en comparación con los controles (60). La aplicación de miel también reduce o elimina el mal olor de la herida (8,61). La miel es higroscópica, puede deshidratar a las bacterias, y su alto contenido de azúcar causa inhibición del crecimiento bacteriano con mejoría de la cicatrización a través de efectos anti-inflamatorios y reducción del edema y exudado de la herida (62). También existe evidencia experimental que la miel puede alterar o prevenir la formación de biopelícula (8,63,64).

### **Surfactantes**

Los surfactantes disminuyen la tensión superficial de un líquido, permitiendo que se extienda más fácilmente; también disminuyen la tensión de interfaz entre dos líquidos. La acción de los surfactantes en las heridas facilita la separación de material flojo no viable en la superficie de la herida y tiene potencial para prevenir y manejar las biopelículas. Varias combinaciones de surfactantes y productos con actividad antimicrobiana se han desarrollado (PHMB y undecilenamidopropil betaina; dihidrocloruro de octenidino y fenoxietanol; octenidino y etilhexilglicerina) y se usan clínicamente para desinfección (65,66).

*TIME – Infección e inflamación. ¿Qué ha cambiado? La tabla original de TIME recomendaba que la remoción de focos infecciosos en el lecho de la herida disminuye las citoquinas inflamatorias y la actividad de las proteasas y ayuda a crear un balance bacteriano y un control de la inflamación. Esto sigue vigente 10 años después, pero es ahora el tipo y el comportamiento de los microorganismos en la herida y las opciones para su control lo que suscita un mayor y particular interés. Cuando los microorganismos de la biopelícula se comportan de forma diferente a su fenotipo planctónico, la acción de ciertos agentes antimicrobianos tópicos como la PHMB, el yodo, la plata y la miel necesitan comprenderse mejor, para que estos agentes puedan ser utilizados de forma eficaz en conjunción con el desbridamiento para controlar la biopelícula de la herida.*

### **TIME – Moisture (Humedad)**

La producción excesiva o insuficiente de exudado puede afectar de manera adversa a la cicatrización. El exudado y olor excesivos pueden afectar significativamente la calidad de vida del paciente. Las características del exudado son importantes y cualquier alteración como el aumento de la biocarga o la autólisis del tejido necrótico puede indicar un cambio en el estado de la herida. Las recomendaciones actualizadas para el manejo del exudado se enfocan en la selección de los apósitos o dispositivos apropiados (18,67).

Existen diferencias en la composición entre el exudado de una herida aguda o crónica. El exudado de una herida aguda es rico en leucocitos y nutrientes, mientras que el exudado de una herida crónica tiene niveles altos de proteasas y citoquinas pro-inflamatorias y niveles elevados de MMPs, que disminuyen conforme la cicatrización progresa (68,69). Se cree que la

actividad proteolítica aumentada del exudado de las heridas crónicas inhibe la cicatrización al dañar el lecho de la herida, degradando la matriz extracelular y agravando la integridad de la piel perilesional (67), mientras que los niveles altos de citoquinas promueven y prolongan la respuesta inflamatoria crónica que se observa en este tipo de heridas (69).

Se requiere una humedad apropiada para la acción de los factores de crecimiento, citoquinas y la migración celular – así, demasiado exudado puede causar daño a la piel perilesional y si está muy disminuido, puede inhibir las actividades celulares y llevar a la formación de una escara que inhiba la cicatrización. La formación de biopelícula también ha sido relacionada con un pobre abordaje del exudado (31), con base en el razonamiento de que el exudado de la herida es una fuente potencialmente importante de nutrientes para la biopelícula presente en la misma. La rápida remoción del exudado de la herida ha demostrado facilitar la cicatrización, aunque no todos los pacientes mostraron reducción en las bacterias de la herida (70).

El volumen y viscosidad del exudado debe considerarse cuando se selecciona un apósito ya que algunos apósitos son mejores para manejar el exudado excesivo, mientras que otros son mejores para manejar el exudado viscoso. Los métodos más ampliamente usados para manejar el exudado excesivo son los apósitos absorbentes y la TPN tópica. Los apósitos deben mantener un equilibrio apropiado de la humedad y evitar la maceración o desecación del lecho de la herida. En un análisis combinado de tres estudios posterior al uso de apósitos de hidrogel comparado con gasa como estándar de tratamiento en úlceras de pie diabético (UPD) se encontró mejoría en la cicatrización. No está claro, sin embargo, si esto se logró como resultado del desbridamiento autolítico o la hidratación del lecho de la herida (71). El apósito ideal para la comodidad y conveniencia del paciente es uno que no sea voluminoso, no provoque dolor al recambio y reduzca el número de cambios de apósito necesarios. También deberá ser efectivo terapéuticamente, y en términos de costo, deberá prevenir fugas previniendo y maceración, con facilidad de aplicación y remoción, y .sin que esto vaya en detrimento del costo (69). También es importante que proteja la piel perilesional ya que la actividad proteolítica aumentada del exudado en la herida crónica puede causar daño a la piel, y el exceso en humedad puede causar maceración y erosión. La alergia o sensibilidad al apósito también es una consideración importante, y la piel alrededor de la úlcera debe ser monitorizada en busca de signos que sugieran los problemas anteriores (67,69).

### **Terapia con Presión Negativa (TPN)**

El uso de la TPN es particularmente útil para optimizar el elemento «M» del concepto TIME, ya que provee en la curación de la herida un medio ambiente húmedo y cerrado en pacientes con heridas con exudado alto. Es particularmente efectiva para eliminar el exudado viscoso, pero los recambios frecuentes del apósito pueden ser dolorosos. (67,69)

*TIME- Moisture (Humedad). ¿Qué ha cambiado? El exudado excesivo de la herida impacta severamente el bienestar del paciente y la cicatrización. La regulación del exudado ha sido la piedra angular del tratamiento de las heridas crónicas desde los años 60, con el equilibrio de la*

*humedad como meta. En los últimos 10 años, el enfoque principal ha sido en dos áreas principales – desarrollar formas de entender y mejorar el manejo de la humedad de los apósitos, y el papel de la TPN en remover y contener grandes cantidades de exudado. La investigación en los componentes del exudado de la herida y su relación con la cicatrización y la infección en particular, continúan siendo prioritarios.*

### **TIME – Edge of wound (Borde de la herida-también conocido como avance o progreso del borde epitelial)**

El componente final del acrónimo TIME es probablemente el que ha llevado al mayor debate sobre lo que la «E» representa y de cómo encaja con los otros componentes del concepto TIME. Si la preparación del lecho de la herida es satisfactoria, el cierre de las heridas crónicas puede acelerarse con el uso de injertos parciales de piel o reemplazos biológicos de piel.

La valoración de los bordes de la herida puede indicar si está progresando la contracción y epitelización, y confirmar, ya sea la eficacia del tratamiento de la herida que está siendo utilizado o la necesidad de reevaluar. Una gama cada vez mayor de modalidades de tratamiento han sido propuestas para mejorar la cicatrización, y de esta forma influenciar el «efecto de borde». Estas terapias incluyen: terapia electromagnética, terapia con láser, terapia con ultrasonidos, terapia con oxígeno sistémico y TPN.

El personal de salud también debe considerar la condición de la piel perilesional para valorar la contracción de la herida pues los bordes macerados o secos pueden menoscabar la capacidad de la herida para contraerse.

### **Avances en el manejo del «Borde de la Herida»**

#### (i) Terapia electromagnética (TEM)

La TEM libera un campo electromagnético continuo o pulsado, que, hoy en día, se discute si induce cicatrización del tejido y proliferación celular, aunque el mecanismo exacto es poco claro. La TEM pulsada consiste en pulsos de corta duración, que tiene la ventaja de proteger a los tejidos del daño por el calor generado por los campos continuos. La TEM ha sido usada para tratar UVPs, pero una revisión Cochrane concluyó que no existe evidencia de alta calidad para apoyar la hipótesis de que la TEM acelera el cierre de las UVP. Sin embargo, la misma revisión sugiere que se necesitan más estudios para explorar los efectos de la TEM como un co-adyuvante a la terapia compresiva, o en pacientes que no pueden usar compresión. (72)

#### (ii) Terapia con láser

La terapia con láser de baja intensidad, como los láseres de helio neón (HeNE) o gas de arseniato de galio (GaAs), han sido usados para tratar heridas, en base a la hipótesis de que éste puede mejorar la proliferación y migración celular. Una revisión Cochrane de la terapia láser para UVP concluyó que

no hay evidencia de beneficio o perjuicio de usar terapia con láser en UVP. (73)

#### (iii) Terapia con ultrasonidos

La terapia con ultrasonidos, generada en el rango de los mega Hertz o kilo Hertz, provee energía mecánica que se piensa altera la actividad celular. Hasta hace poco, la terapia en mega Hertz fue usada para tratar la piel esclerosa perilesional. Ha habido un reciente cambio hacia el ultrasonido de baja frecuencia en el rango de los kilo Hertz para cicatrización en hueso o tejido, que se considera promueve la vasodilatación y el desbridamiento. (74) Diversos tipos de dispositivos comerciales de terapia de ultrasonido de baja frecuencia están disponibles con mecanismos de acción diferentes.

#### (iv) Terapia con oxígeno sistémico y cicatrización

Se considera que el oxígeno tiene un papel de vital importancia en la cicatrización, particularmente en las fases inflamatoria y proliferativa. Una revisión del 2011 sobre el papel del oxígeno en cicatrización concluye que el tratamiento suplementario con oxígeno (ya sea respirado por mascarilla o mediante terapia hiperbárica) puede mejorar la angiogénesis, reducir los índices de infección y facilitar una mejor cicatrización (75). Sin embargo, se requiere una mayor evaluación para que ésta terapia sea recomendada para uso clínico en la cicatrización de heridas.

#### (v) TPN

El uso de la TPN ha demostrado estimular la formación de tejido de granulación y el cierre de la herida (76–78). Un estudio ha demostrado que los cambios en el tejido variaban a tres capas dentro de la herida – cada una respondiendo de manera diferente bajo la TPN. La capa más superficial desarrolló tejido de granulación, mientras que las dos capas más profundas demostraron una disminución en el índice de proliferación y la desaparición de los marcadores crónicos de la inflamación y edema, con estabilización del tejido (76). Se ha encontrado que la TPN produce una significativa reducción de la infiltración del tejido por macrófagos CD68+ y una expresión disminuida de IL-1 $\beta$  y TNF $\alpha$  en colgajos de piel libres injertados con piel. También hubo una reducción en la formación de edema intersticial, que mejoró la microcirculación y redujo el daño tisular (79). Varios estudios han demostrado la efectividad de la TPN en heridas que presentan colonización bacteriana y muestran signos activos de infección (80–84). La evidencia va en aumento, lo que apoya el valor de la TPN para tratar heridas difíciles de cicatrizar (2). Cuando se compara con manejo avanzado con cura en ambiente húmedo (CAH) en úlceras de pie diabético (UPD), una mayor proporción de heridas lograron cerrar con TPN (85). Las amputaciones secundarias a UPD, también mostraron una cicatrización postoperatoria más rápida cuando se trataron con TPN, en comparación con los controles (86). Sin embargo, una revisión sistemática y meta-análisis de 21 estudios no encontró evidencia clara que las heridas cierren mejor o peor con TPN en comparación con terapia convencional (87), aunque los autores concedieron que la TPN pudiera tener un efecto positivo en la cicatrización. En su totalidad, la evidencia de muchos estudios apoya un mejor cierre de las heridas con TPN (78,85,88).

*TIME – Edge of wound (Borde de la herida). ¿Qué ha cambiado? El avance en el borde epitelial y un estado mejorado de la piel alrededor (que no fue discutida en el documento original de TIME) es el signo más claro de cicatrización, y una reducción de 20-40% del área de la herida luego de 2 y 4 semanas de tratamiento se ve como un indicador confiable predictivo de cicatrización (69). Varias modalidades de tratamiento para estimular la cicatrización han hecho su introducción; un mayor conocimiento sobre su papel y contraindicaciones es necesario. La «E» también es un recordatorio de la importancia de evaluar, ya que hay un sentir que después de cada intervención clínica específica (desbridamiento, control de la infección, o manejo de la humedad), se deberá regresar a la herida con una valoración del cierre de la misma. La tabla original del TIME apoya esto al sugerir que si la herida no está respondiendo, se debe re-evaluar con consideración a otras terapias adyuvantes o correctoras.*

### Aspectos psicosociales

Se ha visto que los pacientes con heridas crónicas sufren ansiedad y estrés asociados. Tanto como impacto negativo en el bienestar del paciente, el estrés y la ansiedad también pueden tener un impacto negativo en la cicatrización (89). Una encuesta investigando la prevalencia de trastornos del estado de ánimo entre pacientes con heridas agudas y crónicas, mostró que el dolor (particularmente asociado con los cambios de apósitos), falta de control sobre el tratamiento, y vivir con una herida crónica de lenta cicatrización causaban estrés y ansiedad (89). Las terapias sugeridas no farmacológicas para aliviar el dolor en pacientes con heridas crónicas incluyen: terapia cognitiva conductual, hipnosis, acupuntura, distracción, meditación y oración (90).

### Discusión

Aunque los principios fundamentales de la preparación del lecho de la herida TIME permanecen iguales, son facilitados por nuevos avances (Tabla 3):

#### Tejido: el tejido no viable, y el esfacelo y los detritus relacionados a las bacterias.

El desbridamiento sigue siendo el método más rápido y eficiente para eliminar estos materiales. Los clínicos cuentan con una variedad de métodos de desbridamiento para escoger, dependiendo de los requerimientos individuales del paciente y de las habilidades de quien lo practicará. El desbridamiento autolítico será usado muy probablemente en conjunción con otros métodos de desbridamiento, pero también puede usarse solo, si se prefiere una opción más lenta y conservadora. Modalidades nuevas como el ultrasonido de baja frecuencia y el desbridamiento hidroquirúrgico puede ser selectivos, pero requieren de conocimiento clínico avanzado y deben probarse más para su uso eficaz y apropiado. Independientemente de que opción de desbridamiento se elija, el potencial para cicatrizar y las metas deben determinarse antes de comenzar un desbridamiento.

### Infección o inflamación

La infección y la inflamación continúan siendo como el mayor reto para la cicatrización, particularmente en las heridas crónicas. Sin embargo, el conocimiento del proceso inflamatorio y su papel en las heridas crónicas ha aumentado desde que el acrónimo TIME fue desarrollado por primera vez. Ahora se sabe que el reducir la inflamación excesiva puede revitalizar el tejido con una reducción del exudado y reducir el riesgo de infección. La comprensión del fenómeno de las biopelículas – lo que son y cómo detectarlas – ha mejorado considerablemente. La biopelícula en las heridas representa una adivinanza clínica, y el cómo detectarlas permanece como un tema principal; se necesita un método diagnóstico para la detección de la biopelícula. Aunque varios apósitos como la plata, la miel, el cadexómero de yodo y posiblemente la PHMB han mostrado alguna eficacia en alterar la biopelícula, en general el consenso es que la mejor forma de destruirla es por desbridamiento. Una vez que la biopelícula ha sido alterada, entonces es posible implementar tratamientos con agentes antisépticos, ya que la biopelícula es más vulnerable a los antimicrobianos, y previene su re-formación (91). El uso de apósitos antisépticos y soluciones de irrigación de heridas ha sido más ampliamente reintroducido y representa otra área que ha mostrado un gran crecimiento. El aumento reciente en el uso de antisépticos probablemente también refleja las preocupaciones sobre resistencia a antibióticos, mientras que las preocupaciones sobre resistencia microbiana a los antisépticos parecen sin fundamento.

### Desequilibrio en la humedad (Moisture imbalance)

La comprensión del desequilibrio en la humedad ha aumentado y los clínicos son más conscientes de la importancia de mantener un nivel apropiado de humedad en la herida, así como las diferencias existentes entre el exudado una herida aguda y el de una crónica. Hay más apósitos disponibles para manejar «inteligentemente» el exudado y algunos de los componentes que contiene, que pueden afectar de manera adversa la cicatrización. La TPN también ha probado ser una herramienta cada vez de mayor valor, particularmente como extensión del abordaje de las heridas en el ambiente domiciliario.

### Borde de la herida (Edge of wound)

Ha habido considerables avances en los medios para facilitar la cicatrización de la herida, con un mayor uso de la TPN, y nuevas terapias como la TEM, laser y el ultrasonido. La recomendación original hecha por Schultz y colaboradores en 2003, de un abordaje holístico con tratamiento del paciente como un todo, permanece válida a día de hoy. Se deben reconsiderar en cada evaluación las causas de escasa o retrasada cicatrización y factores del paciente que puedan impedir o facilitarla. Lo que es nuevo, sin embargo, es el aumento en la consciencia de las preocupaciones del paciente y el esfuerzo activo en promover el que los pacientes actúen como abogados de su propio cuidado e intereses. Una de las modalidades de tratamiento que ha mostrado mayor desarrollo e interés desde que se desarrolló por primera vez el acrónimo TIME es la TPN. Desde su introducción como un simple medio de eliminar el exudado y

**Tabla 3** Tabla que resume los nuevos avances dentro del concepto TIME

| Observaciones clínicas       | PLH                                                       | Avances                                                                                                                                                                                                                                                                                                                                                                                                                                                                                                                                                                                                                                                                                                  | Factores a considerar                                                                                                                                                                                                                                                                     |
|------------------------------|-----------------------------------------------------------|----------------------------------------------------------------------------------------------------------------------------------------------------------------------------------------------------------------------------------------------------------------------------------------------------------------------------------------------------------------------------------------------------------------------------------------------------------------------------------------------------------------------------------------------------------------------------------------------------------------------------------------------------------------------------------------------------------|-------------------------------------------------------------------------------------------------------------------------------------------------------------------------------------------------------------------------------------------------------------------------------------------|
| <i>Tejido</i>                | Desbridamiento                                            | <p><b>Nuevos métodos</b></p> <ul style="list-style-type: none"> <li>• Ultrasonido de baja frecuencia sin contacto (MIST, Sonoca)</li> <li>• Hidrocirugía (Versajet)</li> <li>• Almohadillas (Debrisoft)</li> </ul> <p><b>Avances en el uso de métodos existentes</b></p> <ul style="list-style-type: none"> <li>• Larvas</li> <li>• Autolítico (miel, hidrogeles)</li> <li>• Uso de enzimas (colagenasa)</li> <li>• Quirúrgico (nuevas guías)</li> <li>• Químico (antisépticos, i.e. plata, PHMB)</li> </ul> <p><b>TPN</b> – como adicional con los métodos de desbridamiento existentes</p>                                                                                                             | <p>Uso de desbridamiento de mantenimiento</p> <p>Consideraciones alrededor de una práctica segura</p> <ul style="list-style-type: none"> <li>• Conocimiento</li> <li>• Habilidad</li> <li>• Competencia</li> <li>• Evidencia de eficacia</li> </ul>                                       |
| <i>Infección/Inflamación</i> | <p>Limpieza de la herida</p> <p>Equilibrio bacteriano</p> | <p>Soluciones microbicidas de irrigación (Prontosan)</p> <p><b>Biopelícula</b></p> <ul style="list-style-type: none"> <li>• Mejor comprensión de las biopelículas y su papel en las heridas que no cicatrizan</li> <li>• Manejo – estrategia combinada para alterar la biopelícula y prevenir su re-organización (desbridamiento, agentes antisépticos)</li> <li>• Detección de la biopelícula</li> </ul> <p>Uso de técnicas de PCR/pirosecuenciación para identificar bacterias/hongos en las heridas</p> <p>Mejor entendimiento del papel de la inflamación persistentes en las heridas crónicas o estancadas</p>                                                                                      | <p>Aumento en la tolerancia bacteriana a los agentes tópicos/sistémicos</p> <p>Flora mixta viviendo en sinergia</p> <p>Estado quiescente de algunas bacterias en las biopelículas reduce la eficacia de los antibióticos</p> <p>Necesidad de métodos diagnósticos para la biopelícula</p> |
|                              | Inflamación persistente                                   | <ul style="list-style-type: none"> <li>• Papel de las MMPs y otras proteasas (métodos diagnósticos e inhibidores)</li> <li>• Papel de las biopelículas en promover la inflamación en la herida</li> </ul>                                                                                                                                                                                                                                                                                                                                                                                                                                                                                                |                                                                                                                                                                                                                                                                                           |
|                              | Manejo de la infección / Inflamación                      | <ul style="list-style-type: none"> <li>• Aumento en el uso de agentes antisépticos</li> <li>• Papel de la plata nanocrystalina como anti-inflamatoria</li> <li>• Combinación de surfactantes con antimicrobianos – alteración de la biopelícula</li> <li>• TPN combinada con instilación de soluciones microbicidas para reducir los niveles de bacterias en forma planctónica y en biopelícula</li> <li>• Uso alternativo de agentes nuevos o existentes – e.g. usar plata nanocrystalina para frenar la inflamación</li> <li>• Mejora en la cicatrización de las heridas tratadas con formulaciones hechas ex profeso de antibióticos/antisépticos tópicos con base en perfiles bacterianos</li> </ul> | <p>Pruebas diagnósticos - ¿Cuándo? Y ¿Qué tan frecuentes?</p> <p>Detección a pie de cama</p> <p>Revisión de los antimicrobianos apropiados</p> <p>Rotación de productos</p> <p>Resistencia microbiana (particularmente a los antibióticos)</p>                                            |
| <i>(Moisture) Humedad</i>    | <p>Equilibrio en la humedad</p> <p>Exudado</p>            | <p>Mejor reconocimiento de la necesidad de mantener niveles apropiados de humedad</p> <p>Mejor entendimiento de la composición del exudado – diferencias entre el fluido de una herida crónica y aguda</p> <ul style="list-style-type: none"> <li>• Actividad proteolítica dañina del exudado de la herida crónica</li> </ul>                                                                                                                                                                                                                                                                                                                                                                            | <p>Selección de apósitos - ¿Qué debemos considerar?</p> <ul style="list-style-type: none"> <li>• Absorción</li> <li>• Retención</li> <li>• Comodidad del paciente</li> <li>• Poblaciones bacterianas</li> <li>• Sensibilidad o alergia cutáneas</li> </ul>                                |

**Tabla 3** continuado

| Observaciones clínicas | PLH | Avances                                                                                                                                                                                                                                                                                                            | Factores a considerar                                                                                                                                                                     |
|------------------------|-----|--------------------------------------------------------------------------------------------------------------------------------------------------------------------------------------------------------------------------------------------------------------------------------------------------------------------|-------------------------------------------------------------------------------------------------------------------------------------------------------------------------------------------|
|                        |     | Relación del exudado con la carga bacteriana y la formación de biopelícula<br>Selección de apósitos apropiados o dispositivos para el manejo del exudado (i.e. nuevos súper-absorbentes)<br>Mayor énfasis en el manejo de la humedad<br><b>TPN</b> – para la remoción y contención de grandes volúmenes de exudado |                                                                                                                                                                                           |
| (Edge of wound)        |     | Avance del borde epitelial<br>Mejor estado de la piel perilesional<br><b>Evaluación</b> – revise que la herida esté cerrando<br>Uso de la TPN para estimular la contracción<br>Terapias adyuvantes (TEM, Laser, ultrasonido, terapia con oxígeno sistémico)                                                        | Revisitando terapias existentes<br>Uso alternativo de productos e.g. usar la TPN para estabilizar/consolidar heridas<br>Papel de los diagnósticos / complementos terapéutico-diagnósticos |

facilitar el cierre de la herida, hoy parece que también tiene efectos sobre la reducción de la biopelícula y en ser efectiva para las heridas infectadas y de difícil cicatrización; también puede ser que facilite el desbridamiento cuando se usa en combinación con otros métodos de desbridamiento.

Usar el concepto TIME en el cuidado práctico de las heridas despierta nuevas preguntas – por ejemplo, ¿qué tan húmeda debe estar una herida? El conocimiento del manejo del exudado ha mejorado considerablemente, pero como se discutió anteriormente, esta pregunta no se puede contestar simplemente, sino que depende de muchos factores incluyendo el tipo de herida, su localización y el tipo de exudado asociado. La infección de la herida y la comodidad del paciente también son consideraciones importantes, como lo son otros asuntos relacionados a las necesidades del paciente. El personal de salud ha desarrollado una mayor conciencia de los aspectos psicosociales relacionados al cuidado de las heridas – las heridas crónicas en particular pueden causarle al paciente estrés y ansiedad, no solo en relación al dolor, sino en la complejidad de cuidar una herida que no cicatriza, y las preocupaciones sobre aspectos sociales como la apariencia y el mal olor. El personal de salud, la industria y agencias de investigación y salud frecuentemente se enfocan en la cicatrización total como una medida clave de éxito terapéutico, mientras que las personas que viven con una herida pueden tener prioridades diferentes. Esta crítica también ha sido destacada ocasionalmente a nivel del propio acrónimo TIME, al ser éste enfocado en el lecho de la herida, en oposición con las necesidades del paciente como un todo. Será necesario hacer mayor énfasis dentro del marco del TIME para abarcar las preocupaciones del paciente y promover un abordaje holístico de su bienestar en el cuidado de las heridas.

El acrónimo TIME se podría redefinir de su primer estado de evaluación, hacia un segundo estado de manejo consistente en el Tratamiento, Implementación, Monitorización y Evaluación:

1. Tratamiento: Es importante un plan apropiado de tratamiento con base en los objetivos del cuidado que se desean lograr, y los objetivos del marco original de TIME.

- ii. Implementación: Los planes de tratamiento acordados deberán ser implementados de forma consistente para objetivos óptimos y efectivos con evaluación de los éxitos terapéuticos.
- iii. Monitorización: Esta deberá incluir la detección de cualquier evento adverso local o sistémico, y asegurar que las prácticas clínicas y los productos en uso logren el mejor desempeño.
- iv. Evaluación: Todos los tratamientos deberían ser evaluados objetiva y regularmente para incluir, por ejemplo, una curva de cicatrización, una herramienta validada de evaluación del dolor, un índice de desbridamiento o mediciones de otros síntomas y una evaluación del impacto en la calidad de vida.

## Conclusión

El cierre completo y oportuno de la herida es el principal objetivo de todos los aspectos del cuidado de las heridas, aunque no siempre es posible. Las heridas crónicas, en particular presentan un reto para el cuidado efectivo de las mismas. Desde que hace una década se publicó por primera vez el acrónimo TIME, la comprensión del la PLH y de las vías inflamatorias y de la infección ha aumentado considerablemente, como lo han hecho las opciones de tratamiento. Por necesidad, la mayor cantidad de guías clínicas representan «obras en proceso» debido al cambio continuo y al entendimiento que se tiene de la patología ulcerosa, la cicatrización y los agentes terapéuticos. Aunque los principios básicos del concepto de TIME no han cambiado mucho desde su primera aparición, la aplicación de estos principios se ha expandido, con avances en el conocimiento e intervenciones para el manejo de la herida. Es importante considerar que, mientras que los conceptos del TIME proveen de un marco valioso para la valoración y manejo de las heridas, éstos están íntimamente ligados.

Así que, 10 años después – ¿es el TIME todavía relevante para la práctica clínica? Aunque hay muchos nuevos avances en el campo de la terapia de las heridas y nuestra comprensión de las heridas, los principios básicos de Tejido, Infección/Inflamación, Humedad (Moisture) y Borde de la herida

(Edge of the wound) todavía permanecen importantes en guiar al personal de salud en su abordaje del manejo de una herida.

## Agradecimientos

Los autores agradecen al comité del Instituto Internacional de Infección en Heridas (IWII) por sus comentarios y mejoras a este manuscrito. Los miembros del comité son: Terry Swanson - Presidente (Australia), David Armstrong (EUA), Joyce Black (EUA), Keryln Carville (Australia), José Contreras-Ruiz (México), Marc Despatis (Canadá), Val Edwards-Jones (Reino Unido), Jacqui Fletcher (Reino Unido), Georgina Gethin (Irlanda), Jenny Hurlow (EUA), David Keast (Canadá), Patricia Larsen (EUA), David Leaper (Reino Unido), Heather Orsted (Canadá), Greg Schultz (EUA), Dianne Smith (Australia), Geoff Sussman (Nueva Zelanda), Richard White (Reino Unido).

Los autores quieren también extender su agradecimiento a los miembros del Consejo sobre Preparación del Lecho de la Herida que desarrollaron los principios originales del TIME, y a Keith Harding (Reino Unido), presidente del IWII 2007–2012.

Finalmente, el Instituto Internacional para la Infección de las Heridas (IWII) quiere agradecer a los médicos y enfermeras de habla hispana que hicieron favor de traducir este documento. Ellos son: José Contreras Ruiz (México), María Teresa González M. (Colombia), Estela Bilevich (Argentina), Anahí Belatti (Argentina) y Joan- Enric Torra i Bou (España).

*El Instituto Internacional para las Heridas Infectadas es un grupo internacional de clínicos, científicos, y otras partes interesadas comprometidas a producir trabajo original que contribuya a la investigación, la educación y la evidencia en la infección de las heridas mientras permanece una organización multinacional independiente.*

## Referencias

- Schultz GS, Sibbald RG, Falanga V, Ayello EA, Dowsett C, Harding K, Romanelli M, Stacey MC, Teot L, Vanscheidt W. Wound bed preparation: a systematic approach to wound management. *Wound Repair Regen* 2003;**11**:1–28.
- Ousey K, McIntosh C. Understanding wound bed preparation and wound debridement. *Br J Community Nurs* 2010;**15**:S22–8.
- Steed DL, Donohoe D, Webster MW, Lindsley L. Effect of extensive debridement and treatment on the healing of diabetic foot ulcers. *Diabetic Ulcer Study Group. J Am Coll Surg* 1996;**183**:61–4.
- Walcott RD, Kennedy JP, Dowd SE. Regular debridement is the main tool for maintaining a healthy wound bed in most chronic wounds. *J Wound Care* 2009;**18**:54–6.
- Leak K. Ten top tips for debridement. *Wounds Intl* 2012;**3**:21–3.
- Smith F, Dryburgh N, Donaldson J, Mitchell M. Debridement for surgical wounds. *Cochrane Database Syst Rev* 2011 May 11;**(5)**: CD006214.
- Weller C, Sussman G. Wound dressings update. *J Pharmacy Pract Res* 2006;**36**:318–24.
- Fleck CA, Chakravarthy D. Newer debridement methods for wound bed preparation. *Adv Skin Wound Care* 2010;**23**:313–5.
- Falanga V. Wound bed preparation and the role of enzymes: A case for multiple actions of therapeutic agents. *Wounds* 2002;**14**:47–57.
- Stotts NA. Wound infection: diagnosis and management. In: Morison MJ, Ovington LG, Wilkie K, editors. *Chronic wound care: a problem based approach*. Edinburgh: Mosby, 2004:101–16.
- Granick MS, Posnett J, Jacoby M, Norruthun S, Ganchi PA, Datiashvili RO. Efficacy and cost-effectiveness of a high-powered parallel waterjet for wound debridement. *Wound Repair Regen* 2006;**14**:394–7.
- Saap LJ, Falanga V. Debridement performance index and its correlation with complete closure of diabetic foot ulcers. *Wound Repair Regen* 2002;**10**:354–9.
- Falanga V, Saap LJ, Ozonoff A. Wound bed score and its correlation with healing of chronic wounds. *Dermatol Ther* 2006;**19**:383–90.
- Falanga V, Brem H, Ennis WJ, Wolcott R, Gould LJ, Ayello EA. Maintenance debridement in the treatment of difficult-to-heal chronic wounds. Recommendations of an expert panel. *Ostomy Wound Manage* 2008;Suppl: 2–13; quiz 14–5.
- Moore ZE, Cowman S. Wound cleansing for pressure ulcers. *Cochrane Database Syst Rev* 2005 Oct 19;**(4)**: CD004983.
- Fernandez R, Griffiths R. Water for wound cleansing. *Cochrane Database Syst Rev* 2008 Jan 23;**(1)**: CD003861.
- Fernandez R, Griffiths R. Water for wound cleansing. *Cochrane Database Syst Rev* 2012 Feb 15;**(2)**: CD003861.
- Sibbald RG, Goodman L, Woo KY, Krasner DL, Smart H, Tariq G, Ayello EA, Burrell RE, Keast DH, Mayer D, Norton L, Salcido RS. Special considerations in wound bed preparation 2011: an update. *Adv Skin Wound Care* 2011;**24**:415–36; quiz 437–8.
- Riley S, Tongue J, Strokes S, Jefferies L. Using Negative Pressure Wound Therapy as an aid to debridement. Poster presentation. In: *Wounds UK*. Harrogate, 2009.
- Davis J. Combining wound debridement modalities with Negative Pressure Wound Therapy. Abstract #123; *WOCN Society 38<sup>th</sup> Annual Conference*. 2006.
- Wolcott RD, Dowd S, Kennedy J, Jones CE. Biofilm-based wound care. *Adv Wound Care* 2008;**1**:311–6.
- Vowden P, Vowden K, Carville K. Antimicrobial dressings made easy. *Wounds Intl* 2011;**2**(1).
- Percival S, Bowler P. Biofilms and their potential role in wound healing. *Wounds* 2004;**16**:234–40.
- Gardner SE, Frantz RA, Dobbeling BN. The validity of the clinical signs and symptoms used to identify localised chronic wound infection. *Wound Repair Regen* 2001;**9**:178–86.
- Rhoads DD, Wolcott RD, Percival SL. Biofilm in wounds: management strategies. *J Wound Care* 2008;**17**:502–8.
- Phillips PL, Wolcott RD, Fletcher J, Schultz GS. Biofilms Made Easy. *Wounds Intl* 2010;**1**.
- Wolcott RD, Rhoads DD, Dowd SE. Biofilms and chronic wound inflammation. *J Wound Care* 2008;**17**:333–41.
- James GA, Swogger E, Wolcott R, Pulcini E, Secor P, Sestrich J, Costerton JW, Stewart PS. Biofilms in chronic wounds. *Wound Repair Regen* 2008;**16**:37–44.
- Driffield K, Woodmansey E, Floyd H. The use of silver-containing dressings to prevent biofilm formation by single and mixed bacterial flora. Poster presentation #285, *EWMA* 2008.
- White RJ, Cutting KF. Wound biofilms – are they visible? *J Wound Care* 2012;**21**:552–3.
- Hurlow J, Bowler PG. Potential implications of biofilm in chronic wounds: a case series. *J Wound Care* 2012;**21**:109–19.
- Drosou A, Falabella A, Kirsner RS. Antiseptics on wounds: an area of controversy. *Wounds* 2003;**15**:149–66.
- Leaper D. Topical antiseptics in wound care: time for reflection. *Int Wound J* 2011;**8**:547–9.
- Leaper D. Editorial: European Union antibiotic awareness day. Relevance for wound care practitioners. *Int Wound J* 2010;**7**:314–5.
- Venous leg ulcers: infection diagnosis and microbiology investigation. Quick reference guide for primary care; 2010 revision. Association of Medical Microbiologists/Health Protection Agency.
- Kirsner R. Infection and chronic wounds. *Wound healing perspectives* 2006;**3**:1–2.
- Gardner SE, Frantz RA, Saltzman CL, Hillis SL, Park H, Scherubel M. Diagnostic validity of three swab techniques for identifying chronic wound infection. *Wound Repair Regen* 2006;**14**:548–57.

38. Glasser JS, Guymon CH, Mende K, Wolf SE, Hospenthal DR, Murray CK. Activity of topical antimicrobial agents against multidrug-resistant bacteria recovered from burn patients. *Burns* 2010;**36**:1172–84.
39. Jakobsen L, Andersen AS, Friis-Møller A, Jørgensen B, Krogfelt KA, Frimodt-Møller N. Silver resistance: an alarming public health concern? *Int J Antimicrob Agents* 2011;**38**:454–5.
40. Leaper D (Chair), Ayello EA, Carville K, Fletcher J, Keast D, Lindholm C, Martínez JLL, Mavanini SD, McBain A, Moore Z, Opananon S, Pina E. Appropriate use of silver dressings in wounds. International Consensus Document. *Wounds Int*. London 2012.
41. Nadworny LP, Wang J, Tredjet EE, Burrell ER. Anti-inflammatory activity of nanocrystalline silver in a porcine contact dermatitis model. *Nanomedicine* 2008;**4**:241–51.
42. Nadworny LP, Wang J, Tredjet EE, Burrell ER. Anti-inflammatory activity of nanocrystalline silver-derived solutions in porcine contact dermatitis. *J Inflamm (Lond)* 2010;**7**.
43. Sibbald RG, Contreras-Ruiz J, Coutts P, Fierheller M, Rothman A, Woo K. Bacteriology, inflammation, and healing: a study of nanocrystalline silver dressings in chronic venous leg ulcers. *Adv Skin Wound Care* 2007;**20**:549–58.
44. Wright JB, Lam K, Buret GA, Olson EM, Burrell ER. Early healing events in a porcine model of contaminated wounds: Effects of nanocrystalline silver on matrix metalloproteinases, cell apoptosis and healing. *Wound Repair Regen* 2002;**10**:141–51.
45. Percival S, Slone W, Linton S, Okel T, Corum L, Thomas JG. The antimicrobial efficacy of a silver alginate dressing against a broad spectrum of clinically relevant wound isolates. *Int Wound J* 2011;**8**:237–43.
46. Hooper SJ, Percival SL, Hill KE, Thomas DW, Hayes AJ, Williams DW. The visualisation and speed of kill of wound isolates on a silver alginate dressing. *Int Wound J* 2012 Mar 8. [Epub ahead of print]
47. Michaels JA *et al.* Randomized controlled trial and cost-effectiveness analysis of silver-donating antimicrobial dressings for venous leg ulcers (VULCAN trial). *Br J Surg* 2009;**96**:1147–56.
48. Iheanacho I. Silver dressings: do they work? *Drugs Ther Bull* 2010;**48**:38–42.
49. White R, Kingsley A. Silver dressings in the light of recent clinical research: what can be concluded? *Wounds UK* 2010;**6**:157–8.
50. Barrett S, Battacharyya M, Butcher M, Enoch S, Fumarola S, Gray D, Stephen Haynes J, Edwards-Jones V, Leaper D, Strohal R, White R, Wicks G, Young T. *PHMB and its potential contribution to wound management*. Aberdeen: Wounds UK, 2010.
51. Leaper D, Drake R. Should one size fit all? An overview and critique of the VULCAN study on silver dressings. *Int Wound J* 2011;**8**:1–4.
52. Sibbald RG, Leaper DJ, Queen D. Iodine Made Easy. *Wounds Int* 2011;**2**.
53. O'Meara S, Al-Kurdi D, Ovington LG. Antibiotics and antiseptics for venous leg ulcers. *Cochrane Database Syst Rev* 2008 Jan 23;**(1)**: CD003557.
54. Akiyama H, Oono T, Saito M, Iwatsuki K. Assessment of cadexomer iodine against *Staphylococcus aureus* biofilm *in vivo* and *in vitro* using confocal laser scanning microscopy. *J Dermatol* 2004;**31**:529–34.
55. Phillips PL, Yang Q, Sampson E, Schultz G. Effects of antimicrobial agents on an *in vitro* biofilm model of skin wounds. *Adv Wound Care* 2010;**1**:299–304.
56. Schultz GS, Phillips P, Yang Q, Sampson E. Microbicidal effects of wound dressings on mature bacterial biofilm on pig skin explants. Poster presentation P142, *EWMA* 2009, Helsinki, Finland.
57. Dissemmond J, Assadian O, Gerber V, Kingsley A, Kramer A, Leaper DJ, Mosti G, Piatkowski de Grzymala A, Riepe G, Risse A, Romanelli M, Strohal R, Traber J, Vassel-Biergans A, Wild T, Eberlein T. Classification of wounds at risk and their antimicrobial treatment with polihexanide: A practice-oriented expert recommendation. *Skin Pharmacol Physiol* 2011;**24**: 245–55.
58. Best practice statement. *The use of topical antiseptic/antimicrobial agents in wound management, 2nd edn*. London: Wounds UK, 2011.
59. Eberlein T, Haemmerle G, Signer M, Haemmerle G, Signer M, Gruber Moesenbacher U, Traber J, Mittlboeck M, Abel M, Strohal R. Comparison of PHMB-containing dressing and silver dressings in patients with critically colonised or locally infected wounds. *J Wound Care* 2012;**21**:12–20.
60. Gethin G, Cowman S. Manuka honey vs. hydrogel—a prospective, open label, multicentre, randomised controlled trial to compare de-sloughing efficacy and healing outcomes in venous ulcers. *J Clin Nurs* 2009;**18**: 466–74.
61. Molan PC. The evidence supporting the use of honey as a wound dressing. *Int J Low Extrem Wounds* 2006;**5**:40–54.
62. Simon A, Traynor K, Santos K, Blaser G, Bode U, Molan P. Medical honey for wound care – still the ‘latest resort’? *Evid Based Complement Alternat Med* 2009;**6**:165–73.
63. Maddocks SE, Lopez MS, Rowlands RS, Cooper RA. Manuka honey inhibits the development of *Streptococcus pyogenes* biofilms and causes reduced expression of two fibronectin binding proteins. *Microbiology* 2012;**158**(Pt 3):781–90.
64. Alandejani T, Marsan J, Ferris W, Slinger R, Chan F. Effectiveness of honey on *Staphylococcus aureus* and *Pseudomonas aeruginosa* biofilms. *Otolaryngol Head Neck Surg* 2009;**141**:114–8.
65. Vanscheidt W, Harding K, Téot L, Siebert J. Effectiveness and tissue compatibility of a 12-week treatment of chronic venous leg ulcers with an octenidine based antiseptic - a randomized, double-blind controlled study. *Int Wound J* 2012;**9**:316–23.
66. Romanelli M, Dini V, Barbanera S, Bertone MS, Brilli NTC. Evaluation of the efficacy and tolerability of a solution containing Undecylenamidopropyl-Betaine and Polihexanide (Prontosan) in controlling the bacterial burden of chronic wounds during wound bed preparation. Poster Presentation. *SAWC* 2008, San Diego, USA.
67. Romanelli M, Vowden K, Weir D. Exudate management Made Easy. *Wounds Int* 2010; **1**(0): available from <http://www.woundsinternational.com>.
68. Trengove NJ, Stacey MC, MacAuley S, Bennett N, Gibson J, Burslem F, Murphy G, Schultz G. Analysis of the acute and chronic wound environments: the role of proteases and their inhibitors. *Wound Repair Regen* 1999;**7**:442–52.
69. Dowsett C. Exudate management: a patient-centred approach. *J Wound Care* 2008;**17**:249–52.
70. Wolcott RD. The effect of a hydroconductive dressing on the suppression of wound biofilm. *Wounds* 2012;**24**:132–7.
71. Edwards J, Stapley S. Debridement of diabetic foot ulcers. *Cochrane Database Syst Rev* 2010 Jan 20;**(1)**: CD003556.
72. Aziz Z, Cullum NA, Flemming K. Electromagnetic therapy for treating venous leg ulcers. *Cochrane Database Syst Rev* 2011 Mar 16;**(3)**: CD002933.
73. Fleming K, Cullum NA. Laser therapy for venous leg ulcers. *Cochrane Database Syst Rev* 2000;**(2)**: CD001182.
74. Ennis WJ, Valdes W, Gainer M, Meneses P. Evaluation of clinical effectiveness of MIST ultrasound therapy for the healing of chronic wounds. *Adv Skin Wound Care* 2006;**19**:437–46.
75. Chambers AC, Leaper DJ. Role of oxygen in wound healing: a review of evidence. *J Wound Care* 2011;**20**:160–4.
76. Bassetto F, Lancerotto L, Salmaso R, Pandis L, Pajardi G, Schiavon M, Tiengo C, Vindigni V. Histological evolution of chronic wounds under negative pressure therapy. *J Plastic Reconstr Aesthet Surg* 2011;**65**:91–9.
77. Dini V, Miteva M, Romanelli P, Bertone M, Romanelli M. Immunohistochemical evaluation of venous leg ulcers before and after negative pressure wound therapy. *Wounds* 2011;**23**:257–66.
78. Suissa D, Danino A, Nikolis A. Negative-pressure therapy versus standard wound care: a meta-analysis of randomized trials. *Plast Reconstr Surg* 2011;**128**:498e–503e.
79. Eisenhardt SU, Schmidt Y, Thiele JR, Iblher N, Penna V, Torio-Padron N, Stark GB, Bannasch H. Negative pressure wound therapy reduces the ischaemia/reperfusion-associated inflammatory response in free muscle flaps. *J Plast Reconstr Aesthet Surg* 2011;**65**:640–9.

80. Ngo QD, Vickery K, Deva AK. The effect of topical negative pressure on wound biofilms using an *in vitro* wound model. *Wound Repair Regen* 2012;**20**:83–90.
81. Šimek M *et al.* Topical negative pressure in the treatment of deep sternal infection following cardiac surgery: Five year results of first-line application protocol. *EWMA Journal May* 2011;**11**:P38.
82. Singh K, Anderson E, Harper JG. Overview and management of sternal wound infection. *Semin Plast Surg* 2011;**25**:25–33.
83. Wallin AM, Boström L, Ulfvarson J, Ottosson C. Negative pressure wound therapy – a descriptive study. *Ostomy Wound Manage* 2011;**57**:22–9.
84. Shweiki E, Gallagher KE. Negative pressure wound therapy in acute, contaminated wounds: documenting its safety and efficacy to support current global practice. *Int Wound J.* 2012 15 Mar [Epub ahead of print].
85. Blume PA, Walters J, Payne W, Ayala J, Lantis J. Comparison of negative pressure wound therapy using vacuum-assisted closure with advanced moist wound therapy in the treatment of diabetic foot ulcers. *Diabetes Care* 2008;**31**:631–6.
86. Armstrong D, Lavery LA. Diabetic Foot Study Consortium. *Negative pressure wound therapy after partial diabetic foot amputation. Lancet* 2005;**366**:1704–10.
87. Peinemann F, Sauerland S. Negative pressure wound therapy – systematic review of randomized controlled trials. *Dtsch Arztebl Int* 2011;**108**:381–9.
88. Burlew CC, Moore EE, Biffl WL, Bensard DD, Johnson JL, Barnett CC. One hundred percent fascial approximation can be achieved in the postinjury open abdomen with a sequential closure protocol. *J Trauma Acute Care Surg* 2012;**72**:235–41.
89. Upton D, Solowiej K. Mood disorders in patients with acute and chronic wounds: a health professional perspective. *J Wound Care* 2012;**21**:42–8.
90. White R. A multinational survey of the assessment of pain when removing dressings. *Wounds UK* 2008;**4**:1–6.
91. Wolcott RD, Rumbaugh KP, James G, *et al.* Biofilm maturity studies indicate sharp debridement opens a time-dependent therapeutic window. *J Wound Care* 2010;**19**:320–28.
